# Supplementary material for: Lokiceratops rangiformis gen. et sp. nov. (Ceratopsidae: Centrosaurinae) from the Campanian Judith River Formation of Montana reveals rapid regional radiations and extreme endemism within centrosaurine dinosaurs
Source: PeerJ journal article supplement (doi:10.7717/peerj.17224), 2024-06-20
Supplement: TableS1.pdf [file TableS1.pdf]

**Table S1: Temporal distribution of taxa in the phylogenetic analysis with sources.**

| <b>Taxon</b>                          | <b>Formation</b>           | <b>Age Range</b>                 | <b>Sources</b> |
|---------------------------------------|----------------------------|----------------------------------|----------------|
| <i>Hypsilophodon foxii</i>            | Wessex Formation           | 145–125 Ma                       | 1              |
| <i>Lesothosaurus diagnosticus</i>     | upper Elliot Formation     | 190.8-182.7 Ma                   | 2              |
| <i>Stegoceras valdensis</i>           | Dinosaur Park Formation    | 76.354 ± 0.015-75.639 ± 0.025 Ma | 3,4            |
| <i>Homalocephale calathocercos</i>    | Nemegt Formation           | 70.6-68 ma                       | 5,6,7,8        |
| <i>Prenocephale prenes</i>            | Nemegt Formation           | 70.6-68 Ma                       | 5,6,7,8        |
| <i>Yinlong downsi</i>                 | Shishugou Formation        | 162.2-159.7 Ma                   | 9              |
| <i>Hualianceratops wucaiwansensis</i> | Shishugou Formation        | 162.2-159.7 Ma                   | 9              |
| <i>Xuanhuaceratops niei</i>           | Houcheng Formation         | 162.2-138 Ma                     | 10             |
| <i>Chaoyangsaurus youngi</i>          | Tuchengzi Formation        | 152-139 Ma                       | 10             |
| <i>Psittacosaurus xinjiangensis</i>   | Tugulu Group               | 126-100 Ma                       | 11             |
| <i>Psittacosaurus gobiensis</i>       | Bayan Gobi Formation       | 113-100.5 Ma                     | 12             |
| <i>Psittacosaurus major</i>           | lowermost Yixian Formation | 124-122 Ma                       | 13             |
| <i>Psittacosaurus lujiatunensis</i>   | lowermost Yixian Formation | 123 Ma                           | 14             |
| <i>Psittacosaurus mongoliensis</i>    | Khukhtek Formation         | 126-113 Ma                       | 13,14          |
| <i>Psittacosaurus sinensis</i>        | Doushan Formation          | 129.4-113 Ma                     | 15,16          |
| <i>Psittacosaurus meileyingensis</i>  | Jiufotang Formation        | 126-113 Ma                       | 17,18          |
| <i>Psittacosaurus sibiricus</i>       | Ilek Formation             | 126-100 Ma                       | 19             |
| <i>Mosaiceratops azumai</i>           | Xiaguan Formation          | 100-89.8 Ma                      | 20             |
| <i>Beg tsi</i>                        | Ulaanoosh                  | 113-94 Ma                        | 21             |
| <i>Liaoceratops yanzigouensis</i>     | Yixian Formation           | 125.8-125.7 Ma                   | 22             |
| <i>Aquilops americanus</i>            | Cloverly Formation         | 108.5-104 Ma                     | 23             |
| <i>Archaeoceratops yujingziensis</i>  | Xinminbao Group            | 126-113 Ma                       | 24,25          |
| <i>Yamaceratops dorn gobiensis</i>    | Javhklant Formation        | 86.3-72.10 Ma                    | 26             |
| <i>Auroroceratops rugosus</i>         | Xinminbao Group            | 126-113 Ma                       | 27             |
| <i>Archaeoceratops oshimai</i>        | Xinminbao Group            | 126-113 Ma                       | 24,25          |
| <i>Cerasinops hodgskissi</i>          | Two Medicine Formation     | 82.419 ± 0.074-75.259 ± 0.027 Ma | 28,4           |
| <i>Montanoceratops cerorhynchus</i>   | St. Mary River Formation   | 71.1-69.8 Ma                     | 29             |
| <i>Udanoceratops tschizhovi</i>       | Djadochta Formation        | 76.5-70.5 Ma                     | 5,6,7,8        |
| <i>Prenoceratops pieganensis</i>      | Two Medicine Formation     | 75.259 ± 0.027-74.6 Ma           | 30,4           |
| <i>Zhuchengceratops inexpectus</i>    | Hongtuya Formation         | 77.3 ± 1.54-73.5 ± 0.3 Ma        | 31             |
| <i>Leptoceratops gracilis</i>         | Scollard Formation         | 66.9-66.2 Ma                     | 29             |
| <i>Protoceratops hellenikorhinus</i>  | Bayan Mandahu Formation    | 76.5-70.5 Ma                     | 5,6,7,8        |
| <i>Protoceratops andrewsi</i>         | Djadochta Formation        | 76.5-70.5 Ma                     | 5,6,7,8        |
| <i>Protoceratops</i> sp. IGM 100-1246 | Djadochta Formation        | 76.5-70.5 Ma                     | 5,6,7,8        |
| <i>Breviceratops kozlowskii</i>       | Barauungoyot Formation     | 76.5-70.5 Ma                     | 5,6,7,8        |
| <i>Bagaceratops rozhdestvenskyi</i>   | Barauungoyot Formation     | 76.5-70.5 Ma                     | 5,6,7,8        |
| <i>Ajkaceratops kozmai</i>            | Csehbánya Formation        | 86-84 Ma                         | 32             |
| <i>Graciliceratops mongoliensis</i>   | Bayan Shireh Formation     | 95.9-89.6 Ma                     | 33             |
| <i>Turanoceratops tardabilis</i>      | Bissekty Formation         | 92-90 Ma                         | 34             |
| <i>Zuniceratops christopheri</i>      | Moreno Hill Formation      | 92.5-92 Ma                       | 35             |

**Table S1 continued: Temporal distribution of centrosaurine taxa in phylogenetic analysis.**

| <b>Taxon</b>                            | <b>Formation</b>           | <b>Age Range</b>                   | <b>Sources</b> |
|-----------------------------------------|----------------------------|------------------------------------|----------------|
| <i>Diabloceratops eatoni</i>            | Wahweap Formation          | 81.42-81.01 Ma (81.27 + 0.36 -0.5) | 36             |
| <i>Machairoceratops cronusi</i>         | Wahweap Formation          | 80.68-79.26 Ma (80.06 + 0.62 -0.8) | 36             |
| <i>Menefeeeceratops sealeyi</i>         | Menefee Formation          | 81-78.5 Ma                         | 37,38,39       |
| <i>Yehuecauhceratops mudei</i>          | Aguja Formation            | 80.0-76.28 ± 0.06 Ma               | 40,41,42       |
| <i>Xenoceratops foremostensis</i>       | Foremost Formation         | 79.5-78.6 Ma                       | 43,4,44        |
| <i>Crittendenceratops krzyzanowskii</i> | Fort Crittenden Formation  | 83-77 Ma                           | 47,48,49       |
| <i>Nasutoceratops titusi</i>            | Kaiparowits Formation      | 76.394 ± 0.040 -75.609 ± 0.015 Ma  | 50,4           |
| <i>Avaceratops lammersi</i> type        | Judith River Formation     | 78.594 +- 0.024 - 76.24 +- 0.18    | 51,46,4        |
| <i>Avaceratops</i> sp. MOR 692          | Judith River Formation     | 75.8-75.4 Ma                       | 46,41          |
| <i>Avaceratops</i> sp. CMN 8804         | Oldman Formation           | 76.470 + 0.14/ - 0.084 - 75.8 Ma   | 52,41,4        |
| <i>Lokiceratops rangiformis</i>         | Judith River Formation     | 78.08 + 0.3 - 0.9 Ma               | 4              |
| <i>Albertaceratops nesmoi</i>           | Oldman Formation           | 78.28 + 0.2 - 0.9 Ma               | 4              |
| <i>Medusaceratops lokii</i>             | Judith River Formation     | 78.18 + 0.2 - 0.9 Ma               | 4              |
| <i>Wendiceratops pinhornensis</i>       | Oldman Formation           | 78.08 + 0.3 - 0.9 Ma               | 53,4           |
| <i>Sinoceratops zhuchengensis</i>       | Hongtuya Formation         | 77.3 ± 1.54-73.5 ± 0.3 Ma          | 31             |
| <i>Coronosaurus brinkmani</i>           | Oldman Formation           | 77.5-76.354 ± 0.057 Ma             | 54,50,55,4     |
| <i>Spinops sternbergorum</i>            | Oldman Formation           | 76.717 ± 0.020-76.354 ± 0.057 Ma   | 56,4           |
| <i>Centrosaurus apertus</i>             | Dinosaur Park Formation    | 76.470 + 0.14/ - 0.084 - 75.8 Ma   | 3,4            |
| <i>Styracosaurus albertensis</i>        | Dinosaur Park Formation    | 75.8 -75.3 Ma                      | 3,57,4         |
| <i>Styracosaurus ovatus</i>             | Two Medicine Formation     | 78.2-75.259 ± 0.027 Ma             | 58,59,4        |
| <i>Stellasaurus ancellae</i>            | Two Medicine Formation     | 78.2-75.259 ± 0.027 Ma             | 58,59,4        |
| <i>Einosaurus procurvicornis</i>        | Two Medicine Formation     | 75.259 ± 0.027 Ma                  | 53,51,4        |
| <i>Ildesleigh pachyrhinosaur</i>        | Dinosaur Park Formation    | 75.25-75.22 Ma                     | 61,57,4        |
| <i>Achelousaurus horneri</i>            | Two Medicine Formation     | 75.259 ± 0.027-74.6 Ma             | 53,51,4        |
| <i>Pachyrhinosaurus lakustai</i>        | Wapiti Formation           | 73.73 ± 0.25-71.89 ± 0.14 Ma       | 62,29          |
| <i>Pachyrhinosaurus perotorum</i>       | Prince Creek Formation     | 73.4-70.0 ± 0.2 Ma                 | 63,64,55       |
| <i>Pachyrhinosaurus canadensis</i>      | Horseshoe Canyon Formation | 72.7-71.8 Ma                       | 29             |
| CPC 279                                 | Cerro Del Pueblo Fm.       | 73.63-72.74 Ma                     | 70,71,55       |

**Table S1 concluded: Temporal distribution of chasmosaurine taxa in phylogenetic analysis.**

| Taxon                              | Formation                           | Age Range                                  | Sources    |
|------------------------------------|-------------------------------------|--------------------------------------------|------------|
| <i>Mercuriceratops gemini</i>      | Judith River and Dinosaur Park fms. | 76.470 + 0.14/ - 0.084 - 76.354 ± 0.057 Ma | 57,4       |
| <i>Regaliceratops peterhewsi</i>   | Horseshoe Canyon Formation          | 68.8-68.5 Ma                               | 65,29      |
| <i>Kosmoceratops richardsoni</i>   | Kaiparowits Formation               | 76.394 ± 0.040 -75.609 ± 0.015 Ma          | 50,4       |
| <i>Vagaceratops irvinensis</i>     | Dinosaur Park Formation             | 75.3-75.2 Ma                               | 3,4        |
| <i>Spiclypeus shipporum</i>        | Judith River Formation              | 76.329 ± 0.035-76                          | 66,46,44   |
| <i>Chasmosaurus belli</i>          | Dinosaur Park Formation             | 76.05-75.55 Ma                             | 3,57,4     |
| <i>Mojoceratops kaiseni</i>        | Dinosaur Park Formation             | 76.2-76.1                                  | 3,57,4     |
| <i>Agujaceratops mavericus</i>     | Aguja Formation                     | 80.0-76.28 ± 0.06 Ma                       | 40,41,42   |
| <i>Agujaceratops mariscalensis</i> | Aguja Formation                     | 80.0-76.28 ± 0.06 Ma                       | 40,41,42   |
| <i>Chasmosaurus russelli</i>       | Dinosaur Park Formation             | 75.1 -74.45                                | 3,4        |
| <i>Utahceratops gettyi</i>         | Kaiparowits Formation               | 76.394 ± 0.040 -75.609 ± 0.015 Ma          | 50,4       |
| <i>Pentaceratops sternbergii</i>   | Fruitland Kirtland Formation        | 75.5 -75.166 ± 0.014 Ma                    | 67,55,68,4 |
| <i>Anchiceratops ornatus</i>       | Horseshoe Canyon Fm.                | 72.2-70.6 Ma                               | 29         |
| <i>Arrhinoceratops brachyops</i>   | Horseshoe Canyon Fm.                | 71.8-70.5 Ma                               | 29         |
| <i>Eotriceratops xerinsularis</i>  | Horseshoe Canyon Fm.                | 68.9-68.7 Ma                               | 29         |
| <i>Torosaurus latus</i>            | Hell Creek Formation                | 66.9-66.0 Ma                               | 55         |
| <i>Torosaurus utahensis</i>        | North Horn Formation                | 66.9-66.0 Ma                               | 55         |
| <i>Triceratops horridus</i>        | Hell Creek Formation                | 66.5-66.0 Ma                               | 69,55      |
| <i>Triceratops prorsus</i>         | Hell Creek Formation                | 66.9-66.5 Ma                               | 69,55      |

REFERENCES FOR TABLE S1: Sources of taxon age.

1. Galton PM. 1974. The ornithischian dinosaur *Hypsilophodon* from the Wealden of the Isle of Wight. *Bulletin of the British Museum (Natural History) Geology* London. (5)1:1-152.
2. Bordy EM, Abrahams M, Sharman GR, Viglietti PA, Benson RBJ, McPhee BW, Barrett PM, Sciscio L, Condon D, Mundil R, Rademan Z. 2020. A chronostratigraphic framework for the upper Stormberg Group: implications for the Triassic-Jurassic boundary in southern Africa. *Earth-Science Reviews* 203:103120.
3. Ryan MJ, Evans DC. 2005. Ornithischian Dinosaurs. In: Currie PJ, Koppelhus E, eds. *Dinosaur Provincial Park: A spectacular ancient ecosystem revealed*. Bloomington: Indiana University Press 312-348.
4. Ramezani J, Beveridge TL, Rogers RR, Eberth DA, Roberts EM. 2022. Calibrating the zenith of dinosaur diversity in the Campanian of the Western Interior Basin by CA-ID-TIMS U-Pb geochronology. *Scientific Reports* 12(1):16026.
5. Shuvalov VF. 2000. The Cretaceous stratigraphy and palaeobiology of Mongolia. In: Benton MJ, Kurochkin EN, Novikov IV, Shishkin MA, Unwin DA, eds. *The Age of Dinosaurs in Russia and Mongolia*. Cambridge University Press, 256–278.
6. Hicks FJ, Fastovsky D, Nichols DJU, Watabe M. 2001. Magnetostratigraphic correlation of Late Cretaceous dinosaur-bearing localities in the Nemegt and Ulan Nuur Basins, Gobi Desert, Mongolia. *Geological Society of America Programs Abstracts* A:323.
7. Dashzeveg D, Dingus L, Loope DB, Swisher III CC, Dulam T, Sweeney MR. 2005. New Stratigraphic Subdivision, Depositional Environment, and Age Estimate for the Upper Cretaceous Djadokhta Formation, Southern Ulan Nur Basin, Mongolia, *Papers in the Earth and Atmospheric Sciences* 209.

8. **Carpenter K, Hayashi S, Kobayashi Y, Maryńska T, Barsbold R, Sato K, Obata I. 2011.** *Saichania chulsanensis* (Ornithischia, Ankylosauridae) from the upper cretaceous of Mongolia. *Palaeontographica Abteilung A* **294(1-3)**:1-61.
9. **Eberth DA, Xing X, Clark JM. 2010.** Dinosaur death pits from the Jurassic of China. *Palaios* **25(1/2)**:112–125.
10. **Zhao X, Cheng Z, Xu X. 1999.** The Earliest Ceratopsian from the Tuchengzi Formation of Liaoning, China. *Journal of Vertebrate Paleontology* **19(4)**:681–691.
11. **Brinkman DB, Eberth DA, Ryan MJ, Chen P. 2001.** The occurrence of *Psittacosaurus xinjiangensis* Sereno and Chow, 1988 in the Urho area, Junggar Basin, Xinjiang, People's Republic of China. *Canadian Journal of Earth Sciences* **38(12)**:1781-1786.
12. **Sereno PC, Xijin Z, Lin T. 2009.** A new psittacosaur from Inner Mongolia and the parrot-like structure and function of the psittacosaur skull. *Proceedings of the Royal Society B*. **277(1679)**:199–209.
13. **Sereno PC. 2010.** Taxonomy, cranial morphology, and relationships of parrot-beaked dinosaurs (Ceratopsia:Psittacosaurus). In: Ryan MJ, Chinnery-Allgeier BJ, Eberth DA, eds. *New Perspectives on Horned Dinosaurs: The Royal Tyrrell Museum Ceratopsian Symposium*. Bloomington and Indianapolis: Indiana University Press, 21–58.
14. **Hedrick BP, Dodson P. 2013.** Lujiatun Psittacosaurids: Understanding Individual and Taphonomic Variation Using 3D Geometric Morphometrics. *PLoS ONE* **8(8)**:e69265.
15. **Young CC. 1958.** The dinosaur remains of Laiyang, Shantung. *Palaeontologia Sinica Series C* **16**:53–159.
16. **Weishampel DB, Barrett PM, Coria RA, Le Loeuff J, Xu X, Zhao X, Sahni A, Gomani EMP, Noto CR. 2004.** Dinosaur Distribution. In Weishampel DB, Dodson P, Osmólska H, eds. *The Dinosauria, Second Edition*. University of California Press, 517-606.
17. **Eberth DA, Russell DA, Braman DR, Deino AL. 1993.** The age of the dinosaur-bearing sediments at Tebch, Inner Mongolia, People's Republic of China. *Canadian Journal of Earth Sciences*. **30(10)**:2101–2106.
18. **He HY, Wang XL, Zhou ZH, Wang F, Boven A, Shi GH, Zhu RX. 2004.** Timing of the Jiufotang Formation (Jehol Group) in Liaoning, northeastern China, and its implications. *Geophysical Research Letters* **31(13)**:1709.
19. **Leshchinskiy SV, Fayngertz SC, Voronkevich AV, Maschenko AV, Averianov EN, Alexander O. 2000.** Preliminary results of the investigation of the Shestakovo localities of Early Cretaceous vertebrates". In: Komarov AV, ed. *Materials of the Regional Conference of the Geologists of Siberia, Far East and North East of Russia* (in Russian). Tomsk: GalaPress, 363–366.
20. **Zheng W, Jin X, Xu X. 2015.** A psittacosaurid-like basal neoceratopsian from the Upper Cretaceous of central China and its implications for basal ceratopsian evolution. *Scientific reports* **5(14190)**:1-9.
21. **Yu C, Prieto-Marquez A, Chinzorig T, Zorigt B, Norell MA. 2020.** A neoceratopsian dinosaur from the early Cretaceous of Mongolia and the early evolution of ceratopsia. *Communications Biology* **3(10)**:1038.
22. **Zhong Y, Huyskens MH, Yin Q-Z, Wang Y, Ma Q, Xu Y-G. 2021.** High-precision geochronological constraints on the duration of “Dinosaur Pompeii” and the Yixian Formation. *National Science Review* **8(6)**:nwab063.
23. **Burton D, Greenhalgh BW, Britt BB, Kowallis BJ, Elliott Sr WS, et al. 2006** New radiometric ages from the Cedar Mountain Formation, Utah and the Cloverly Formation, Wyoming: implications for contained dinosaur faunas. *Geological Society of America Abstracts with Programs* **38**: 52.
24. **Tang F, Luo Z-X, Zhou Z-H, You H-L, Georgi JA, Tang Z-L, Wang X-Z. 2001.** Biostratigraphy and palaeoenvironment of the dinosaur-bearing sediments in Lower Cretaceous of Mazongshan area, Gansu Province, China. *Cretaceous Research* **22(1)**:115–129.
25. **You H-L, Tanque K, Dodson P. 2010.** A new species of *Archaeoceratops* (Dinosauria: Neoceratopsia) from the Early Cretaceous of the Mazongshan area, northwestern China. In: Ryan MJ, Chinnery-Allgeier BJ, Eberth DA, eds. *New Perspectives on Horned Dinosaurs: The Royal Tyrrell Museum Ceratopsian Symposium*. Bloomington and Indianapolis: Indiana University Press, 59–67.
26. **Eberth DA, Kobayashi Y, Lee Y-N, Mateus O, Therrien F, Zelenitsky DK, Norell MA. 2009.** Assignment of *Yamaceratops dorn gobiensis* and associated redbeds at Shine Us Khudag (eastern Gobi, Dorn gobi Province, Mongolia) to the redescribed Javkhlant Formation (Upper Cretaceous). *Journal of Vertebrate Paleontology* **29(1)**:295-302.
27. **You H-L, Li D, Ji Q, Lamanna H, Dodson P. 2005.** On a new genus of basal Neoceratopsian dinosaur from the Early Cretaceous of Gansu Province, China. *Acta Geologica Sinica* **79(5)**:593–597.

28. **Chinnery BJ, Horner JR. 2007.** A new neoceratopsian Dinosaur linking North American and Asian taxa. *Journal of Vertebrate Paleontology* **27**:625-641.
29. **Eberth DA, Kamo SL. 2019.** High-precision U–Pb CA–ID–TIMS dating and chronostratigraphy of the dinosaur-rich Horseshoe Canyon Formation (Upper Cretaceous, Campanian–Maastrichtian), Red Deer River valley, Alberta, Canada. *Canadian Journal of Earth Sciences* **57(10)**:1220-1237.
30. **Chinnery BJ. 2004.** Description of *Prenoceratops pieganensis* gen et sp. nov. (Dinosauria: Neoceratopsia) from the Two Medicine Formation of Montana. *Journal of Vertebrate Paleontology* **24(3)**:572–590.
31. **An W, Kuang H, Liu Y-Q, Peng N, Xu K-M, Xu H, Zhang P, Wang K-B, Chen S-Q, Zhang Y-X. 2016.** Detrital zircon dating and tracing the provenance of dinosaur bone beds from the Late Cretaceous Wangshi Group in Zhucheng, Shandong, East China. *Journal of Palaeogeography* **5(10)**:1016.
32. **Ősi A, Butler RJ, Weishampel DB. 2010.** A Late Cretaceous ceratopsian dinosaur from Europe with Asian affinities. *Nature*. **465(7297)**:466–468.
33. **Kurumada Y, Aoki S, Aoki K, Kato D, Saneyoshi M, Tsogtbaatar K, Windley BF, Ishigaki S. 2020.** Calcite U–Pb age of the Cretaceous vertebrate-bearing Bayn Shire Formation in the Eastern Gobi Desert of Mongolia: usefulness of caliche for age determination. *Terra Nova* **32(4)**:246–252.
34. **Averianov A, Sues H-D. 2012.** Correlation of Late Cretaceous continental vertebrate assemblages in Middle and Central Asia. *Journal of Stratigraphy* **36(2)**:462–485.
35. **Kirkland JI, Smith DK, Wolfe DG. 2005.** Holotype braincase of *Nothronychus mckinleyi* Kirkland and Wolfe 2001 (Theropoda; Therizinosauridae) from the Upper Cretaceous (Turonian) of west central New Mexico. In Carpenter K ed. *The Carnivorous Dinosaurs Indiana University Press* 87-95.
36. **Beveridge TL, Roberts EM, Ramezani J, Titus AL, Eaton JG, Irmis RB, Sertich JJW. 2022.** Refined geochronology and revised stratigraphic nomenclature of the Upper Cretaceous Wahweap Formation, Utah, U.S.A. and the age of early Campanian vertebrates from southern Laramidia, *Palaeogeography, Palaeoclimatology, Palaeoecology* **591**:110876.
37. **Lucas SG, J.A. Spielmann JA, Braman DR, Brister BS, Peters L, McIntosh WC. 2005.** Age of the Cretaceous Menefee Formation, Gallina Hogback, Rio Arriba County, New Mexico. *New Mexico Geological Society, 56<sup>th</sup> Field Conference Guidebook. Geology of the Chama Basin* **56**: 231–235.
38. **Dalman SG, Lucas SG, Jasinski SE, Lichti AJ, Dodson P. 2021.** The oldest centrosaurine: a new ceratopsid dinosaur (Dinosauria: Ceratopsidae) from the Allison Member of the Menefee Formation (Upper Cretaceous, early Campanian), northwestern New Mexico, USA. *Paläontologische Zeitschrift* **95**:291–335.
39. **McDonald AT, Wolfe DG, Freedman Fowler EA, Gates TA. 2021.** A new brachylophosaurin (Dinosauria: Hadrosauridae) from the Upper Cretaceous Menefee Formation of New Mexico. *PeerJ* **9**:e11084 <https://doi.org/10.7717/peerj.11084>
40. **Befus KS, Hanson RE, Lehman, TM, Griffen WR. 2008.** Cretaceous basaltic phreatomagmatic volcanism in West Texas: Maar complex at Peña Mountain, Big Bend National Park. *Journal of Volcanology and Geothermal Research* **173(3–4)**:245-264.
41. **Lehman TM, Wick SL, Barnes KR. 2017.** New specimens of horned dinosaurs from the Aguja Formation of West Texas, and a revision of *Agujaceratops*. *Journal of Systematic Palaeontology* **15(8)**:641-674.
42. **Leslie CE, Peppe DJ, Williamson TE, Heizler M, Jackson M, Atchley SC, Nordt L, Standhardt B. 2018.** Revised age constraints for Late Cretaceous to early Paleocene terrestrial strata from the Dawson Creek section, Big Bend National Park, west Texas. *Geological Society of America Bulletin* **130(7-8)**:1143–1163.
43. **Ryan MJ, Evans DC, Shepherd KM. 2012.** A new ceratopsid from the Foremost Formation (middle Campanian) of Alberta. *Canadian Journal of Earth Science* **49**:1251–1262.
44. **Rogers RR, Eberth DA, Ramezani J. 2023.** The “Judith River–Belly River problem” revisited (Montana–Alberta–Saskatchewan): New perspectives on the correlation of Campanian dinosaur-bearing strata based on a revised stratigraphic model updated with CA-ID-TIMS U-Pb geochronology. *Geological Society of America Bulletin* doi: <https://doi.org/10.1130/B36999.1>
45. **Eberth DA. 2005.** The Geology. In: Currie PJ, Koppelhus EB, eds. *Dinosaur Provincial Park: A spectacular ancient ecosystem revealed*. Bloomington: Indiana University Press, 54–82.
46. **Rogers RR, Kidwell SM, Deino AL, Mitchell JP, Nelson K, Thole JT. 2016.** Age, correlation, and lithostratigraphic revision of the Upper Cretaceous (Campanian) Judith River Formation in its type area (North-Central Montana), with a comparison of low- and high-accommodation alluvial records. *Journal of Geology* **124(1)**.

47. **Drewes H. 1971.** Mesozoic stratigraphy of the Santa Rita Mountains, southeast Tucson, Arizona: U.S. Geological Survey, Professional Paper 658-C:1-81.
48. **Lucas SG, Heckert AB. 2005.** Distribution, age and correlation of Cretaceous fossil vertebrates from Arizona: New Mexico Museum of Natural History and Science Bulletin 29, p. 105-110.
49. **Caylor EA, Carrapa B, Sundell K, DeCelles PG, Smith JM. 2021.** Age and deposition of the Fort Crittenden Formation: A window into Late Cretaceous Laramide and Cenozoic tectonics in southeastern Arizona. *Bulletin of the Geological Society of America* **133(9-10)**:1996-2016.
50. **Roberts EM, Sampson SD, Deino AL, Bowring S. 2013.** The Kaiparowits Formation: a remarkable record of Late Cretaceous terrestrial environments, ecosystems and evolution in Western North America. In: Titus AL, Loewen MA, eds. *At the Top of the Grand Staircase: The Late Cretaceous of Southern Utah*. Bloomington: Indiana University Press, 85–106.
51. **Penkalski P, Dodson P. 1999.** The morphology and systematics of *Avaceratops*, a primitive horned dinosaur from the Judith River Formation (late Campanian) of North America, with the description of a second skull. *Journal of Vertebrate Paleontology* **19**:692-711.
52. **Ryan MJ, Holmes R, Mallon J, Loewen M, Evans DC. 2017.** A basal ceratopsid (Centrosaurinae: Nasutoceratopsini) from the Oldman Formation (Campanian) of Alberta, Canada. *Canadian Journal of Earth Science* **54(1)**:1–14.
53. **Evans DC, Ryan MJ. 2015.** Cranial anatomy of *Wendiceratops pinhornensis* gen. et sp. nov., a centrosaurine Ceratopsid (Dinosauria: Ornithischia) from the Oldman Formation (Campanian), Alberta, Canada, and the evolution of Ceratopsid nasal ornamentation. *PLoS ONE* **10(7)**:e0130007.
54. **Ryan MJ, Russell AP. 2005.** A new centrosaurine ceratopsid from the Oldman Formation of Alberta and its implications for centrosaurine taxonomy and systematics. *Canadian Journal of Earth Sciences* **42(7)**:1369.
55. **Fowler DW. 2017.** Revised geochronology, correlation, and dinosaur stratigraphic ranges of the Santonian-Maastrichtian (Late Cretaceous) formations of the Western Interior of North America. *PLoS ONE* **12(11)**: e0188426.
56. **Farke AA, Ryan MJ, Barrett PM, Tanke DH, Braman DR, Loewen MA, Graham MR. 2011.** A new centrosaurine from the Late Cretaceous of Alberta, Canada, and the evolution of parietal ornamentation in horned dinosaurs. *Acta Palaeontologica Polonica* **56(4)**:691-702.
57. **Mallon JC. 2019.** Competition structured a Late Cretaceous megaherbivorous dinosaur assemblage. *Scientific Reports* **9**:15447. <https://doi.org/10.1038/s41598-019-51709-5>
58. **Rogers RR, Swisher III CC, Horner JR. 1993.** <sup>40</sup>Ar/<sup>39</sup>Ar age and correlation of the nonmarine Two Medicine Formation (Upper Cretaceous), northwestern Montana, U.S.A. *Canadian Journal of Earth Sciences* **30(5)**:1066-1075.
59. **Wilson JP, Ryan MJ, Evans DC. 2020.** A new, transitional centrosaurine ceratopsid from the Upper Cretaceous Two Medicine Formation of Montana and the evolution of the '*Styracosaurus*-line' dinosaurs. *Royal Society Open Publishing* **7(4)**:200284.
60. **Sampson SD. 1995.** Two new horned dinosaurs from the Upper Cretaceous Two Medicine Formation of Montana; With a phylogenetic analysis of the Centrosaurinae (Ornithischia: Ceratopsidae). *Journal of Vertebrate Paleontology* **15(4)**:743–760.
61. **Ryan MJ, Eberth DA, Brinkman DB, Currie PJ, Tanke DH. 2010.** A New *Pachyrhinosaurus*-like ceratopsid from the Upper Dinosaur Park Formation (Late Campanian) of Southern Alberta, Canada. In: Ryan MJ, Chinnery-Allgeier B, Eberth DA, eds. *New Perspectives on Horned Dinosaurs: The Royal Tyrrell Museum Ceratopsian Symposium*. Bloomington: Indiana University Press, 141–155.
62. **Currie PJ, Langston W, Tanke DH. 2008.** A new species of *Pachyrhinosaurus* (Dinosauria, Ceratopsidae) from the Upper Cretaceous of Alberta, Canada. In: Currie PJ, Langston W, Tanke DH, eds. *A New Horned Dinosaur from an Upper Cretaceous Bone Bed in Alberta*. Ottawa, Ontario, Canada: NRC Research Press, 1–108.
63. **Conrad JE, McKee EH, Turrin BD. 1992.** Age of tephra beds at the Ocean Point dinosaur locality, North Slope, Alaska based on K-Ar and <sup>40</sup>Ar/<sup>39</sup>Ar analyses; U.S. Geological Survey Bulletin 1990 Chapter C:1-12.
64. **Fiorillo AR, Tykoski RS. 2012.** A new Maastrichtian species of the centrosaurine ceratopsid *Pachyrhinosaurus* from the North Slope of Alaska: *Acta Palaeontologica Polonica* **57**: 561-573.
65. **Brown CM, Henderson DM. 2015.** A New Horned Dinosaur Reveals Convergent Evolution in Cranial Ornamentation in Ceratopsidae. *Current Biology* **25(12)**:1641–1648.

66. **Mallon JC, Ott CJ, Larson PL, Iuliano EM, Evans DC. 2016.** *Spichypeus shipporum* gen. et sp. nov., a boldly audacious new chasmosaurine ceratopsid (Dinosauria: Ornithischia) from the Judith River Formation (Upper Cretaceous: Campanian) of Montana, USA. *PLoS ONE* **11(5)**:e0154218.
67. **Fassett JE, Heizler MT. 2017.** An improved new age for the C33n-C32r paleomagnetic reversal, San Juan Basin, NW New Mexico and SW Colorado, In: Karlstrom KE, Gonzales DA, Zimmerer MJ, Heizler M, Ulmer-Scholle DS, eds. *The Geology of the Ouray-Silverton Area. New Mexico Geological Society, Guidebook, 68th Field Conference* 115-121. <https://doi.org/10.56577/FFC-68.115>
68. **Fowler DW, Freedman-Fowler E. 2020.** Transitional evolutionary forms in chasmosaurine ceratopsid dinosaurs: evidence from the Campanian of New Mexico. *PeerJ* 8(e9251).
69. **Scannella JB, Fowler DW, Goodwin MB, Horner JR. 2014.** Evolutionary trends in *Triceratops* from the Hell Creek Formation, Montana. *Proceedings of the National Academy of Sciences* **111**:10245-10250.
70. **Loewen MA, Sampson SD, Lund EK, Farke AA, de Leon C, Aguillón Martínez MC, Rodríguez de la Rosa RA, Getty MA, Eberth DA. 2010.** Horned dinosaurs (Ornithischia: Ceratopsidae) from the Upper Cretaceous (Campanian) Cerro del Pueblo Formation, Coahuila, Mexico. In: Ryan MJ, Chinnery-Allgeier B, Eberth DA, eds. *New Perspectives on Horned Dinosaurs: The Royal Tyrrell Museum Ceratopsian Symposium. Bloomington: Indiana University Press* 99–116.
71. **Eberth DA, Delgado De Jesús CR, Lerbekmo JM, Brinkman DB, Rubén A. Rodríguez-de la Rosa, RA, Sampson SD. 2004.** Cerro del Pueblo Fm (Difunta Group, Upper Cretaceous), Parras Basin, southern Coahuila, Mexico: reference sections, age, and correlation. *Revista Mexicana De Ciencias Geologicas* **21**:335-352.
